# Supplementary material for: A Pilot Feasibility Randomized Controlled Trial on the Ontario Brain Injury Association Peer Support Program
Source: MDPI journal article supplement (doi:10.3390/jcm10132913), 2021-06-29
Supplement: s1 [file s1]

**Table S1.** Community integration results at baseline, two months, and intervention completion.

| Outcome Measure        | Baseline    |             |         | 2 Months    |             |         | 4 Months    |            |         | Hedge's g (95% CI)*    | d <sub>ppc</sub> |
|------------------------|-------------|-------------|---------|-------------|-------------|---------|-------------|------------|---------|------------------------|------------------|
| CIQ Home Integration   | a, n=4      | b, n=7      | p-value | a, n=5      | b, n=7      | p-value | a, n=5      | b, n=7     | p-value |                        |                  |
| Mean (SD)              | 4.6 (2.31)  | 5.8 (2.75)  | 0.51    | 5.3 (2.40)  | 5.3 (1.87)  | 0.977   | 3.6 (2.67)  | 5.4 (2.15) | 0.217   | 0.759 (-0.428 - 1.946) | - 0.214          |
| Median (IQR)           | 5.5 (4)     | 5 (5)       | 1       | 6.3 (3.75)  | 5 (2.5)     | 0.558   | 3 (5)       | 5 (0)      | 1       |                        |                  |
| CIQ Social Integration | a, n=5      | b, n=7      | p-value | a, n=5      | b, n=7      | p-value | a, n=4      | b, n=7     | p-value | Hedge's g (95% CI)*    | d <sub>ppc</sub> |
| Mean (SD)              | 7 (3.16)    | 7 (2.65)    | 1       | 7 (2.91)    | 7.6 (2.64)  | 0.73    | 7.5 (3.11)  | 8.4 (1.27) | 0.602   | 0.434 (-0.808 - 1.676) | -0.29            |
| Median (IQR)           | 8 (5.5)     | 7 (4)       | 0.876   | 8 (5.5)     | 7 (4)       | 0.755   | 7.5 (6)     | 8(3)       | 0.648   |                        |                  |
| CIQ Productivity       | a, n=5      | b, n=7      | p-value | a, n=6      | b, n=7      | p-value | a, n=6      | b, n=7     | p-value | Hedge's g (95% CI)*    | d <sub>ppc</sub> |
| Mean (SD)              | 2.6 (1.95)  | 3.1 (1.77)  | 0.626   | 2.5 (1.52)  | 2.9 (2.11)  | 0.738   | 2.7 (1.75)  | 3.1 (2.04) | 0.663   | 0.209 (-0.884 - 1.302) | 0.05             |
| Median (IQR)           | 2 (3.5)     | 3 (3)       | 0.639   | 2.5(2.5)    | 3 (4)       | 0.836   | 2.5(2.75)   | 2(4)       | 0.836   |                        |                  |
| CIQ Total              | a, n=4      | b, n=7      | p-value | a, n=5      | b, n=7      | p-value | a, n=4      | b, n=7     | p-value | Hedge's g (95% CI)*    | d <sub>ppc</sub> |
| Mean (SD)              | 16.1 (2.49) | 15.9 (4.88) | 0.932   | 15.3 (4.83) | 15.7 (3.29) | 0.846   | 14.3 (6.65) | 17 (2.58)  | 0.288   | 0.617 (-0.639 - 1.872) | - 0.654          |
| Median (IQR)           | 15.6 (4.62) | 15 (5.25)   | 1       | 17.3(9.25)  | 14 (4.5)    | 0.876   | 12.1 (9.75) | 16 (5)     | 0.23    |                        |                  |

\*A Hedge's g of 0.2, 0.5 and 0.8 represented a small, moderate and large effect size, respectively (Lakens, 2013). These same cut points were used to interpret d<sub>ppc</sub>.

**Table S2.** Mood results at baseline, two months, and intervention completion.

|                   | Baseline    |             |                 | 2 Months    |             |                 | 4 Months    |             |                 | Hedge's <i>g</i> (95% CI)* | <i>d</i> <sub>ppc</sub> |
|-------------------|-------------|-------------|-----------------|-------------|-------------|-----------------|-------------|-------------|-----------------|----------------------------|-------------------------|
| PHQ-9             | a, n=5      | b, n=7      | <i>p</i> -value | a, n=5      | b, n=6      | <i>p</i> -value | a, n=5      | b, n=7      | <i>p</i> -value |                            |                         |
| Mean (SD)         | 14.2 (7.25) | 13.3 (7.09) | 0.832           | 18.8 (8.96) | 13.7 (8.69) | 0.347           | 10.4 (5.72) | 13.0 (5.89) | 0.463           | 0.447 (-0.715 - 1.608)     | -0.452                  |
| Median (IQR)      | 13 (13)     | 17 (12)     | 1               | 15 (16.5)   | 15 (12)     | 0.53            | 10 (11)     | 15 (11)     | 0.432           |                            |                         |
| PHQ-9 Groups      | a, n=4      | b, n=7      | <i>p</i> -value | a, n=4      | b, n=7      | <i>p</i> -value | a, n=5      | b, n=7      | <i>p</i> -value |                            |                         |
| None/minimal      | 0 (0.0)     | 1 (14.3)    | 0.391           | 0 (0.0)     | 1(14.3)     | 0.608           | 1 (16.7)    | 1 (14.3)    | 0.926           |                            |                         |
| Mild              | 1 (16.7)    | 3 (28.6)    |                 | 1 (16.7)    | 1(14.3)     |                 | 1 (16.7)    | 1 (14.3)    |                 |                            |                         |
| Moderate          | 2 (33.3)    | 0 (0.0)     |                 | 1 (16.7)    | 1(14.3)     |                 | 1 (16.7)    | 1 (14.3)    |                 |                            |                         |
| Moderately severe | 1 (16.7)    | 3 (42.9)    |                 | 1 (16.7)    | 3(42.9)     |                 | 2 (33.3)    | 0 (0.0)     |                 |                            |                         |
| Severe            | 1 (16.7)    | 1 (14.3)    |                 | 0 (0.0)     | 0 (0.0)     |                 | 0 (0.0)     | 1 (14.3)    |                 |                            |                         |
| <i>Missing</i>    | 1 (16.7)    | 0 (0.0)     |                 | 2 (33.3)    | 1 (14.3)    |                 | 0 (0.0)     | 0 (0.0)     |                 |                            |                         |

\*A Hedge's *g* of 0.2, 0.5 and 0.8 represented a small, moderate and large effect size, respectively (Lakens, 2013).

**Table S3.** Health-related quality of life results at baseline, two months, and intervention completion.

| SF-20                | Baseline     |              |                 | 2 Months     |              |                 | 4 Months     |              |                 | Hedge's <i>g</i> (95% CI)* | <i>d</i> <sub>ppc</sub> |
|----------------------|--------------|--------------|-----------------|--------------|--------------|-----------------|--------------|--------------|-----------------|----------------------------|-------------------------|
| Physical Functioning | a, n=5       | b, n=7       | <i>p</i> -value | a, n=6       | b, n=7       | <i>p</i> -value | a, n=6       | b, n=7       | <i>p</i> -value |                            |                         |
| Mean (SD)            | 65 (40.99)   | 52.4 (30.70) | 0.554           | 51.4(48.42)  | 48.8 (30.21) | 0.909           | 59.7 (47.26) | 45.2 (35.96) | 0.543           | -0.35 (-1.448 - 0.749)     | 0.05                    |
| Median (IQR)         | 83.3 (70.83) | 50 (42.3)    | 0.53            | 54.2 (100)   | 33.3 (58.33) | 1               | 79.2 (100)   | 41.7 (66.6)  | 0.628           |                            |                         |
| Role Functioning     | a, n=5       | b, n=7       | <i>p</i> -value | a, n=6       | b, n=7       | <i>p</i> -value | a, n=6       | b, n=7       | <i>p</i> -value | Hedge's <i>g</i> (95% CI)* | <i>d</i> <sub>ppc</sub> |
| Mean (SD)            | 20 (44.72)   | 28.6 (48.80) | 0.763           | 25 (41.83)   | 28.6 (39.34) | 0.877           | 54.2 (45.87) | 42.9 (47.24) | 0.671           | -0.242 (-1.337 - 0.852)    | 0.38                    |
| Median (IQR)         | 0 (50)       | 0 (100)      | 0.876           | 0 (62.5)     | 0 (50)       | 0.836           | 62.5 (100)   | 25 (100)     | 0.731           |                            | 9                       |
| Social Functioning   | a, n=5       | b, n=7       | <i>p</i> -value | a, n=6       | b, n=7       | <i>p</i> -value | a, n=6       | b, n=7       | <i>p</i> -value | Hedge's <i>g</i> (95% CI)* | <i>d</i> <sub>ppc</sub> |
| Mean (SD)            | 60 (40.0)    | 57.1 (42.31) | 0.909           | 46.7 (41.31) | 48.6 (39.76) | 0.934           | 33.3 (37.24) | 60 (38.30)   | 0.231           | 0.706 (-0.418 - 1.83)      | -0.66                   |
| Median (IQR)         | 80 (70)      | 80 (80)      | 1               | 50 (85)      | 40 (80)      | 0.945           | 30 (65)      | 60 (80)      | 0.234           |                            |                         |

| Mental Health | a, n=5          | b, n=7      | <i>p</i> -value | a, n=6          | b, n=7     | <i>p</i> -value | a, n=6          | b, n=7          | <i>p</i> -value | Hedge's <i>g</i> (95% CI)* | <i>d</i> <sub>ppc</sub> |
|---------------|-----------------|-------------|-----------------|-----------------|------------|-----------------|-----------------|-----------------|-----------------|----------------------------|-------------------------|
| Mean (SD)     | 50.4<br>(21.28) | 56.0(13.27) | 0.585           | 47.3<br>(20.77) | 52 (13.06) | 0.632           | 51.3<br>(20.15) | 53.1<br>(12.59) | 0.847           | 0.109 (-0.982 - 1.201)     | 0.10<br>2               |
| Median (IQR)  | 56 (38)         | 60 (28)     | 0.639           | 48 (43)         | 52 (16)    | 0.731           | 52 (35)         | 56 (20)         | 0.945           |                            |                         |

  

| Health Perceptions | a, n=5     | b, n=7     | <i>p</i> -value | a, n=6          | b, n=7          | <i>p</i> -value | a, n=6          | b, n=7          | <i>p</i> -value | Hedge's <i>g</i> (95% CI)* | <i>d</i> <sub>ppc</sub> |
|--------------------|------------|------------|-----------------|-----------------|-----------------|-----------------|-----------------|-----------------|-----------------|----------------------------|-------------------------|
| Mean (SD)          | 41 (35.60) | 45 (26.61) | 0.827           | 36.7<br>(30.27) | 41.4<br>(27.49) | 0.772           | 48.3<br>(31.09) | 46.4<br>(22.12) | 0.9             | -0.071 (-1.162 - 1.019)    | 0.16<br>5               |
| Median (IQR)       | 35 (70)    | 50 (40)    | 1               | 30 (62.5)       | 40 (45)         | 0.836           | 52.5 (49)       | 55 (35)         | 1               |                            |                         |

  

| Pain         | a, n=5     | b, n=7     | <i>p</i> -value | a, n=6          | b, n=7          | <i>p</i> -value | a, n=6  | b, n=7          | <i>p</i> -value | Hedge's <i>g</i> (95% CI)* | <i>d</i> <sub>ppc</sub> |
|--------------|------------|------------|-----------------|-----------------|-----------------|-----------------|---------|-----------------|-----------------|----------------------------|-------------------------|
| Mean (SD)    | 36 (40.99) | 60 (23.09) | 0.222           | 36.7<br>(23.38) | 68.6<br>(19.52) | <b>0.021</b>    | 60 (40) | 65.7<br>(19.02) | 0.758           | 0.187 (-0.905 - 1.28)      | 0.53<br>6               |
| Median (IQR) | 40 (70)    | 60 (40)    | 0.202           | 40 (45)         | 60 (20)         | <b>0.035</b>    | 60 (70) | 60 (20)         | 0.836           |                            |                         |

\*A Hedge's *g* of 0.2, 0.5 and 0.8 represented a small, moderate and large effect size, respectively (Lakens, 2013).

Bold with italics indicates statistical significance ( $p < 0.05$ ).

**Table S4.** Self-efficacy results at baseline, two months, and intervention completion.

| Self-efficacy         | Baseline     |              |         | 2 Months     |              |         | 4 Months     |              |         | Hedge's g (95% CI)*     | d <sub>ppc</sub> |
|-----------------------|--------------|--------------|---------|--------------|--------------|---------|--------------|--------------|---------|-------------------------|------------------|
| Social and community  | a, n=5       | b, n=7       | p-value | a, n=6       | b, n=7       | p-value | a, n=6       | b, n=7       | p-value |                         |                  |
| Mean (SD)             | 30.4 (9.18)  | 29.1 (7.22)  | 0.795   | 21.8 (11.75) | 29 (8.79)    | 0.235   | 21.7 (11.55) | 30.4 (5.13)  | 0.132   | 1.005 (-0.152 - 2.161)  | - 1.145          |
| Median (IQR)          | 32 (17)      | 29 (14)      | 0.755   | 24 (22)      | 29 (17)      | 0.366   | 25 (21)      | 29 (7)       | 0.366   |                         |                  |
| Physical functioning  | a, n=5       | b, n=7       | p-value | a, n=5       | b, n=7       | p-value | a, n=6       | b, n=7       | p-value | Hedge's g (95% CI)*     | d <sub>ppc</sub> |
| Mean (SD)             | 5.2 (3.49)   | 6.1 (2.67)   | 0.606   | 4.3 (3.20)   | 6.6 (2.51)   | 0.185   | 6 (2.76)     | 6.9 (2.19)   | 0.545   | 0.365 (-0.734 - 1.464)  | 0                |
| Median (IQR)          | 5 (6.5)      | 7 (4)        | 0.639   | 4 (7)        | 5 (5)        | 0.234   | 7 (3.5)      | 8 (3)        | 0.628   |                         |                  |
| Cognitive functioning | a, n=5       | b, n=7       | p-value | a, n=6       | b, n=7       | p-value | a, n=6       | b, n=7       | p-value | Hedge's g (95% CI)*     | d <sub>ppc</sub> |
| Mean (SD)             | 17.6 (11.65) | 23 (11.46)   | 0.443   | 15 (8.44)    | 21.6 (9.95)  | 0.23    | 19.7 (9.93)  | 25 (10.61)   | 0.372   | 0.514 (-0.594 - 1.622)  | 0.008            |
| Median (IQR)          | 21 (22.5)    | 24 (21)      | 0.53    | 15 (13)      | 20 (17)      | 0.366   | 20 (20.5)    | 26 (18)      | 0.295   |                         |                  |
| Emotional regulation  | a, n=5       | b, n=7       | p-value | a, n=5       | b, n=7       | p-value | a, n=6       | b, n=7       | p-value | Hedge's g (95% CI)*     | d <sub>ppc</sub> |
| Mean (SD)             | 21.8 (15.16) | 23.9 (11.36) | 0.793   | 17.7 (11.08) | 21.6 (9.71)  | 0.512   | 21.3 (9.95)  | 21 (8.41)    | 0.949   | -0.033 (-1.123 - 1.058) | 0.17             |
| Median (IQR)          | 29 (29)      | 27 (22)      | 0.876   | 18.5 (20.25) | 20 (8)       | 0.836   | 22.5 (15.75) | 22 (15)      | 0.945   |                         |                  |
| Total                 | a, n=5       | b, n=7       | p-value | a, n=5       | b, n=7       | p-value | a, n=6       | b, n=7       | p-value | Hedge's g (95% CI)*     | d <sub>ppc</sub> |
| Mean (SD)             | 75 (38.18)   | 82.1 (30.73) | 0.727   | 58.8 (33.30) | 78.7 (25.22) | 0.246   | 68.7 (28.55) | 83.3 (21.55) | 0.315   | 0.585 (-0.529 - 1.698)  | - 0.204          |
| Median (IQR)          | 87 (75)      | 85 (52)      | 0.755   | 61 (67.25)   | 74 (30)      | 0.534   | 75.5 (43.25) | 83 (40)      | 0.628   |                         |                  |

\*A Hedge's g of 0.2, 0.5 and 0.8 represented a small, moderate and large effect size, respectively (Lakens, 2013).
